# Supplementary material for: Chinook salmon and green sturgeon migrate through San Francisco Estuary despite large distortions in the local magnetic field produced by bridges
Source: PLoS One. 2017 Jun 2;12(6):e0169031. doi: 10.1371/journal.pone.0169031 (PMC5456031; doi:10.1371/journal.pone.0169031)
Supplement: S1 Table — (XLSX) [file pone.0169031.s005.xlsx]

## Sheet: Sheet1
Survey Type	Location	Track name	Anomaly (nT)	Location Depth Type			Average
Bridge	Bay Bridge	E1	6100	Deep	Bay	Surface	2732.2
Bridge	Bay Bridge	W1	3187	Deep		Deep	4168
Bridge	Bay Bridge	W2	1847	Deep	Richmond	Surface	2236
Bridge	Bay Bridge	W2	5538	Deep		Deep	1142
Bridge	Bay Bridge	L	1269	Surface	Benicia	Surface	2506.5
Bridge	Bay Bridge	E1	5923	Surface		Deep	3442
Bridge	Bay Bridge	E2	4089	Surface
Bridge	Bay Bridge	W1	901	Surface		Blue color means the profile with the HIGHER anaomaly measure between matched sets (or in the averages)
Bridge	Bay Bridge	W2	1479	Surface
Bridge	Benicia Bridge	1	3442	Deep
Bridge	Benicia Bridge	1	2160	Surface
Bridge	Benicia Bridge	2	2853	Surface
Bridge	Richmond Bridge	2	726	Deep
Bridge	Richmond Bridge	2	707	Deep
Bridge	Richmond Bridge	3	1993	Deep
Bridge	Richmond Bridge	1	3468	Surface
Bridge	Richmond Bridge	1.5	3004	Surface
Bridge	Richmond Bridge	2	728	Surface
Bridge	Richmond Bridge	3	1744	Surface
Cable	Benicia Bridge	1	207.89	Deep
Cable	Benicia Bridge	2	171.69	Deep
Cable	Benicia Bridge	3	169.63	Deep
Cable	Benicia Bridge	5	316.45	Deep
Cable	Benicia Bridge	6	139.77	Deep
Cable	Benicia Bridge	7	283.72	Deep
Cable	Benicia Bridge	9	359.9	Deep
Cable	Benicia Bridge	1	62.64	Surface
Cable	Benicia Bridge	2	65.67	Surface
Cable	Benicia Bridge	3	72.52	Surface
Cable	Benicia Bridge	4	54.21	Surface
Cable	Benicia Bridge	5	76.37	Surface
Cable	Benicia Bridge	8	102.62	Surface
Cable	Benicia Bridge	9	109.78	Surface
Cable	Benicia Bridge	10	105.04	Surface
Cable	Benicia Bridge	16	192.9	Surface
Cable	Richmond Bridge	1	262.84	Deep
Cable	Richmond Bridge	2	230.68	Deep
Cable	Richmond Bridge	3	261.93	Deep
Cable	Richmond Bridge	4	287.09	Deep
Cable	Richmond Bridge	5	207.53	Deep
Cable	Richmond Bridge	6	341.86	Deep
Cable	Richmond Bridge	7	380.52	Deep
Cable	Richmond Bridge	14	230.89	Deep
Cable	Richmond Bridge	15	259.8	Deep
Cable	Richmond Bridge	16	267.59	Deep
Cable	Richmond Bridge	17	278.06	Deep
Cable	Richmond Bridge	18	303.06	Deep
Cable	Richmond Bridge	19	249.58	Deep
Cable	Richmond Bridge	20	197.64	Deep
Cable	Richmond Bridge	1	88.37	Surface
Cable	Richmond Bridge	2	72.86	Surface
Cable	Richmond Bridge	3	106.4	Surface
Cable	Richmond Bridge	5	106.42	Surface
Cable	Richmond Bridge	7	99.64	Surface
Cable	Richmond Bridge	15	92.71	Surface
Cable	Richmond Bridge	16	100.37	Surface
Cable	Richmond Bridge	17	83.62	Surface
Cable	Richmond Bridge	18	122.2	Surface
Cable	Richmond Bridge	19	93.87	Surface
Cable	Richmond Bridge	20	86.21	Surface
Cable	San Pablo Bay	1	364.69	Deep
Cable	San Pablo Bay	2	269.67	Deep
Cable	San Pablo Bay	3	251.6	Deep
Cable	San Pablo Bay	4	245.89	Deep
Cable	San Pablo Bay	6	144.86	Deep
Cable	San Pablo Bay	7	337.69	Deep
Cable	San Pablo Bay	8	552.35	Deep
Cable	San Pablo Bay	9	345.48	Deep
Cable	San Pablo Bay	10	440.28	Deep
Cable	San Pablo Bay	11	661.34	Deep
Cable	San Pablo Bay	12	318.18	Deep
Cable	San Pablo Bay	13	291.24	Deep
Cable	San Pablo Bay	14	184.84	Deep
Cable	San Pablo Bay	15	299.02	Deep
Cable	San Pablo Bay	16	180.28	Deep
Cable	San Pablo Bay	17	280.97	Deep
Cable	San Pablo Bay	18	301.58	Deep
Cable	San Pablo Bay	19	184.57	Deep
Cable	San Pablo Bay	20	188.33	Deep
Cable	San Pablo Bay	21	168.09	Deep
Cable	San Pablo Bay	1	110.73	Surface
Cable	San Pablo Bay	2	112.43	Surface
Cable	San Pablo Bay	3	121.48	Surface
Cable	San Pablo Bay	4	115.8	Surface
Cable	San Pablo Bay	7	137.35	Surface
Cable	San Pablo Bay	8	68.46	Surface
Cable	San Pablo Bay	9	138.82	Surface
Cable	San Pablo Bay	10	100.85	Surface
Cable	San Pablo Bay	12	103.41	Surface
Cable	San Pablo Bay	13	126.42	Surface
Cable	San Pablo Bay	14	95.42	Surface
Cable	San Pablo Bay	15	148.56	Surface
Cable	San Pablo Bay	17	123.53	Surface
Cable	San Pablo Bay	18	100.12	Surface
Cable	San Pablo Bay	19	151.1	Surface
Cable	Bay Bridge	5	689.17	Deep
Cable	Bay Bridge	6	346.52	Deep
